# Supplementary material for: Sero-prevalence and risk factors for Severe Acute Respiratory Syndrome Coronavirus 2 infection in women and children in a rural district of Bangladesh: A cohort study
Source: PubMed Central journal article supplement (PMC9304923; doi:10.7189/jogh.12.05030), 2022-07-23
Supplement: jogh-12-05030-s001.pdf [file jogh-12-05030-s001.pdf]

**Table S1.** Selected characteristics of women and households by blood sample collection status

| <b>Selected Characteristics</b>                            | <b>Total</b>  | <b>Consented<br/>for sample</b> | <b>Refused</b> | <b>P-value</b> |
|------------------------------------------------------------|---------------|---------------------------------|----------------|----------------|
|                                                            | <b>N=2559</b> | <b>n (%)</b>                    | <b>n (%)</b>   |                |
| <b>Women age in years</b>                                  |               |                                 |                |                |
| <30                                                        | 1723          | 1361 (79.0)                     | 362 (21.0)     |                |
| ≥30                                                        | 836           | 680 (81.3)                      | 156 (18.7)     | 0.17           |
| <b>Women education</b>                                     |               |                                 |                |                |
| 0-5 years                                                  | 1116          | 898 (80.5)                      | 218 (19.5)     |                |
| >5 years                                                   | 1443          | 1143 (79.2)                     | 300 (20.8)     | 0.43           |
| <b>Women occupation</b>                                    |               |                                 |                |                |
| Housewife                                                  | 2524          | 2012 (79.7)                     | 512 (20.3)     |                |
| Working/employed                                           | 35            | 29 (82.9)                       | 6 (17.1)       | 0.65           |
| <b>Husband's education*</b>                                |               |                                 |                |                |
| 0-5 years                                                  | 1729          | 1395 (80.7)                     | 334 (19.3)     |                |
| >5 years                                                   | 823           | 640 (77.8)                      | 183 (22.2)     | 0.09           |
| <b>Husband's occupation*</b>                               |               |                                 |                |                |
| Govt/private/self-employed (possibly in-door)              | 936           | 744 (79.5)                      | 192 (20.5)     |                |
| Daily wage/farming/other/does not work (possibly out-door) | 1616          | 1291 (79.9)                     | 325 (20.1)     | 0.81           |
| <b>Household Wealth Index (tertiles)</b>                   |               |                                 |                |                |
| Poor                                                       | 954           | 774 (81.1)                      | 180 (18.9)     |                |
| Middle                                                     | 797           | 634 (79.5)                      | 163 (20.5)     | 0.34           |
| Rich                                                       | 808           | 633 (78.3)                      | 175 (21.7)     |                |

\* Husbands of 7 women died before the beginning of the study.
